# Supplementary material for: Molecular co-evolution of a protease and its substrate elucidated by analysis of the activity of predicted ancestral hatching enzyme
Source: PubMed Central journal article supplement (PMC3819744; doi:10.1186/1471-2148-13-231), 2013-10-25
Supplement: 1471-2148-13-231-S1.pdf [file 1471-2148-13-231-S1.pdf]

Fig. S1 Kawaguchi et al

(A)

|              |                                             |
|--------------|---------------------------------------------|
| O.mykiss     | TGTSVETLLIEVRTYPNFNPVVSVDVAVLHVELRLANGRCOL  |
| O.masou      | TGTSVETLLIEVRTYPNFNPVVSVDVAVLKVVELRLANGRCOL |
| Salmo        | TGTSVETLVIEVKTYPNFNPVVTVDVAVLNVELRLANGRCOL  |
| Glossanodon  | LGTSVSESVVFELR-LMDPFAPVITSGPLOVALRLASGECL   |
| Gadus        | RGVSVETLMTQTMNLAGVVAIAPVIGPIQVELRLGNGVCT    |
| Liparis      | IGTIVQIVVVEVSPLLDPPISVAAVGPIRVELRLGNGOCI    |
| Gasterosteus | IGTAVETLVVEVLPKDPPLPVAAYGPIRVALRLANGVCS     |
| P.sinensis   | IGTAVETLVVEVLPKDPPLPVAAYGPIRVALRLANGVCS     |
| P.pungitius  | IGTAVETLVVEVLPKDPPLPVAAYGPIRVALRLASGVCS     |
| Culaea       | IGTAVETLVVDVSAIINVPPFPVAAYGPIRVALRLANGVCS   |
| Spinachia    | IGTAVETLVVEVLPREPPPLPVAAYGPIRVALRLANGVCS    |
| Apeltes      | IGTAVETLTAEVLPKDPPLPVAAYGPIRVALRLANGVCS     |
| Sparus       | TALSVETLVVEVLPLODPPPLPVAALGPISVHLRLANGVCS   |
| Tetraodon    | TATSVNSLVITFELPSSD-PPQPVASIGFVRVLMRLANGKCT  |
| Takifugu     | TAIL--SLVVELIPGTLPL-PVASTGFLRVHMLANGICT     |
| Verasper     | TGTSIETVVEVLPLODPPPLPVAALGPIRVQLRLANGECL    |
| Pseudopleuro | TGLSIEETVVEVLPNTPPFPVAALGPIRVQLRLANGECE     |
| Oreochromis  | IGTDVETVVEVLPQNIPLPVSAMGPIINVVMRLANGRCOL    |
| Fundulus     | IGTSVETLVVEVLPDNPPLPVAELGPIRVALRLANGVCS     |
| Cypselurus   | VGTSVETLVVEVLPDNPPLPVADFGPQLVHMLRANGVCS     |
| Hyporhamphus | VGTSVETLTAEVLPDNPPLPVAEFGPQLVHMLRANGVCS     |
| Ablennes     | IGTSVETLLAEVLPDNPPLPVADFGPIHVMHMLRANGVCS    |
| Cololabis    | IGTSVETLLVEVLPDNPPLPVADFGPIHVMHMLRANGVCS    |
| O.latipes    | RATSVETLVVEVLPDPSPLSIAELGPLNVYLQIANGVCS     |

(B)

|               |                                         |
|---------------|-----------------------------------------|
| O.latipes     | RATSVETLVVEVLPDPSPLSIAELGPLNVYLQIANGVCS |
| O.luzonensis  | HATSVETLVVEVLPDPSPLSIAELGPLNVYLQIANGVCS |
| O.mekongensis | HATSVETLVVEVLPVDSPLSIAELGPLNVYLQIANGVCS |
| O.celebensis  | HATSVETLVVEVLPVDSPLSIAELGPLNVYLQIANGVCS |
| O.marmoratus  | HATSVETLVVEVLPVDSPLSIAELGPLNVYLQIANGVCS |
| O.javanicus   | HATSVETLVVEVLPVDSPLSIAELGPLNVYLQIANGVCS |
| O.dancena     | HATSVETLVVEVLPVDSPLSIAELGPLNVYLQIANGVCS |

(C)

|              |                                            |    |    |                            |     |                       |     |
|--------------|--------------------------------------------|----|----|----------------------------|-----|-----------------------|-----|
| O.mykiss     | YLDIQSSGGCFGTMGTVGDRQTLISLAQFGCVQHGIIQH... | 74 | 91 | NWQYIYNYAVENFQKRDNTNNL...  | 135 | IPDPSVAIGQRQGMSDIDVLR | 183 |
| O.masou      | YLDIQSSGGCFGTMGTVGDRQTLISLAQFGCVQHGIIQH... |    |    | NWQYIYNYAVENFQKRDNTNNL...  |     | IPDPSVAIGQRQGMSDIDVLR |     |
| Esox         | YLQIESRGGCFSSMGRVGEKQIISLAAYSCTQHGIIRH...  |    |    | NWDYVADYASDNFQKRDNTNNL...  |     | IPDESVRIGQRKEMSDIDILR |     |
| Plecoglossus | YLHIVPKTGCFSGIGCYGDKQIVLSKAGCLQKGIIOH...   |    |    | NWDNVNSY--SDFVKEDTNNL...   |     | IPDPNVVLGQRVMSAIDIKR  |     |
| Spirinchus   | YLNIVPKNGCFSGIGCYGDKQIVLSKAGCLQKGIIOH...   |    |    | DWANVNSP--SDFAKEDTNNL...   |     | IPNANVKIGQRVMSAIDIQR  |     |
| Hypomesus    | YLHIVPKNGCFSGIGCYGDKQIVLSKAGCLQKGIIOH...   |    |    | DWSNVRSF--SDFAKEDTNNL...   |     | IPNANVDIGQRVMSAIDVQR  |     |
| Glossanodon  | YVIFESRFGCSSLGHSGLFHSISLRFGLHHGIIQH...     |    |    | NWENIPTHAAVNFQKRDNTNNL...  |     | IPDPNVPIGQRISMSDIDILR |     |
| Gadus        | YLFKSLFGCFSSVGRIGERQVIVSLQRFQCVNNGIIOH...  |    |    | NWENIHPDKLYNFQKRDNTNNL...  |     | IPDASVRIKNGISGLDIOK   |     |
| Helicolenus  | YLSIEPRSGCSSLIGTGGKQIVLSLQRFQCVRHGIIQH...  |    |    | NWDNIYKVFVNFQKRDNTNNL...   |     | IPDSSVPIGQRDELSDIDILR |     |
| Setarches    | YLSIEPRYGCSSLIGTGGKQIVLSLQRFQCVRHGIIQH...  |    |    | NWDNIYKVFVNFQKRDNTNNL...   |     | IPDSSVPIGQREELSKMDIVR |     |
| Gasterosteus | YLSIEPRAGCFSGVGRIGDKQVVSQRFQCVQNGIIOH...   |    |    | QFNNVPSYMQYNFVKQESDYL...   |     | IPDSSVPIGQRVTMSDIDILR |     |
| P.sinensisα  | YLSIEPRAGCFSSVGRVGFQVVSQRFQCVVNGIVEH...    |    |    | KWDNISDMQYNFVKQESDYL...    |     | IPDPNVPIGQRVTMSDIDILR |     |
| P.sinensisβ  | YLSIEPRAGCFSSVGRVGFQVVSQRFQCVVNGIVEH...    |    |    | KWDNISDMQYNFVKQESDYL...    |     | IPDPNVPIGQRVTMSDIDILR |     |
| P.pungitiusα | YLSIEPRAGCFSSVGRVGFQVVSQRFQCVVNGIVEH...    |    |    | KWDNISDMQYNFVKQESDYL...    |     | IPDPNVPIGQRVTMSDIDILR |     |
| P.pungitiusβ | YLSIEPRAGCFSSVGRVGFQVVSQRFQCVVNGIVEH...    |    |    | KWDNISDMQYNFVKQESDYL...    |     | IPDPNVPIGQRVTMSDIDILR |     |
| Culaea1      | YLSIEPRAGCFSSVGRVGFQVVSQRFQCVVNGIVEH...    |    |    | QWDNISGMQYNFVKQESDYL...    |     | IPDSTVPIGQRVMSDIDILR  |     |
| Culaea2      | YLSIEPRAGCFSSVGRVGFQVVSQRFQCVVNGIVEH...    |    |    | QWDNISGMQYNFVKQESDYL...    |     | IPDSTVPIGQRVMSDIDILR  |     |
| Spinachia    | YLSIEPRAGCFSSVGRVGFQVVSQRFQCVVNGIVEH...    |    |    | KWDNISDMQYNFVKQESDYL...    |     | IPDSSVPIGQRVMSDIDILR  |     |
| Apeltes      | YLSIEPRAGCFSSVGRVGFQVVSQRFQCVVNGIVEH...    |    |    | QWDNISAMQYNFVKQESDYL...    |     | IPDPNVPIGQRVTMSDIDILR |     |
| Tetraodon    | YLSIEPRAGCFSSVGRVGFQVVSQRFQCVVNGIVEH...    |    |    | LWDNIIDHYVNFQKRDNTNNL...   |     | IPDSSVDIGQRVMSAIDVLR  |     |
| Takifugu     | YLSIEPRAGCFSSVGRVGFQVVSQRFQCVVNGIVEH...    |    |    | LWENIIDHYVNFQKRDNTNNL...   |     | YDSSVEIGQRDGMSEIDVLR  |     |
| Verasper     | YLSIEPRYGCSSLIGHVGDQVVSQRFQCVVNGIVEH...    |    |    | NWDNINEYFTYVNFQKRDNTNNL... |     | IPDTSVAIGQRGMSDIDVLR  |     |
| Paralichthys | YLSIEPRYGCSSLIGHVGDQVVSQRFQCVVNGIVEH...    |    |    | NWDNINEYFTYVNFQKRDNTNNL... |     | IPDPSVAMQRNGMSHIDVLR  |     |
| Oxyeleotris  | YLSIEPRYGCSSLIGHVGDQVVSQRFQCVVNGIVEH...    |    |    | NWDNINEYFTYVNFQKRDNTNNL... |     | IPDPNVPIGQRDRMSDIDVLR |     |
| Oreochromis  | YLSIEPRYGCSSLIGHVGDQVVSQRFQCVVNGIVEH...    |    |    | NWQNIKDYFINFQKRDNTNNL...   |     | IPNPNVPIGQRVMSDIDILR  |     |
| Fundulus     | YLSIEPRYGCSSLIGHVGDQVVSQRFQCVVNGIVEH...    |    |    | NWDNINEYFTYVNFQKRDNTNNL... |     | IPDPNVPIGQRVMSDIDILR  |     |
| Cypselurus   | YLNIEPKYGCSSLIGRTGDKQIVLSQRFQCVVNGIVEH...  |    |    | NWENIKEYYLNFKKMDTNNL...    |     | IPDSSVPIGESKSLSDIDVLR |     |
| Ablennes     | YLNIEPKYGCSSLIGRTGDKQIVLSQRFQCVVNGIVEH...  |    |    | NWKNVKEYYLNFKKMDTNNL...    |     | IPDSTVPIGESKSLSDIDILR |     |
| Cololabis    | YLNIEPKYGCSSLIGRTGDKQIVLSQRFQCVVNGIVEH...  |    |    | NWKNVKEYYLNFKKMDTNNL...    |     | IPDPNVPIGESKSLSDIDILR |     |
| O.latipes    | YLSIEPRFGCKSMGTVGDKQVVSQRFQCVVNGIVEH...    |    |    | NWENIHKDFTHNFQKRDNTNNL...  |     | IPNPKAAIGQTERMSDIDILR |     |

(D)

|               |                                         |    |    |                           |     |                       |     |
|---------------|-----------------------------------------|----|----|---------------------------|-----|-----------------------|-----|
| O.latipes     | YLSIEPRFGCKSMGTVGDKQVVSQRFQCVVNGIVEH... | 74 | 91 | NWENIHKDFTHNFQKRDNTNNL... | 135 | IPNPKAAIGQTERMSDIDILR | 183 |
| O.luzonensis  | YLSIEPRFGCKSMGTVGDKQVVSQRFQCVVNGIVEH... |    |    | NWENIKEYYTHNFQKRDNTNNL... |     | IPNPKAAIGQTVGMDIDILR  |     |
| O.mekongensis | YLSIEPRFGCKSMGTVGDKQVVSQRFQCVVNGIVEH... |    |    | NWENIQVYTHNFQKRDNTNNL...  |     | IPNSKAAIGQTVGMSDIDILR |     |
| O.celebensis  | YLSIEPRFGCKSMGTVGDKQVVSQRFQCVVNGIVEH... |    |    | NWNNVIESYTHNFQKRDNTNNL... |     | IPNPNVAIGQTVGMSDIDILR |     |
| O.marmoratus  | YLSIEPRFGCKSMGTVGDKQVVSQRFQCVVNGIVEH... |    |    | NWNNVIESYTHNFQKRDNTNNL... |     | IPNPNVAIGQTVGMSDIDILR |     |
| O.javanicus   | YLSIEPRFGCKSMGTVGDKQVVSQRFQCVVNGIVEH... |    |    | LWDNIEYTHNFQKRDNTNNL...   |     | IPNSNVAIGQTVGMSDIDILR |     |
| O.dancena     | YLSIEPRFGCKSMGTVGDKQVVSQRFQCVVNGIVEH... |    |    | NWDNIEYTHNFQKRDNTNNL...   |     | IPNANAAIGQTVGMSDIDILR |     |
