# Supplementary material for: Molecular co-evolution of a protease and its substrate elucidated by analysis of the activity of predicted ancestral hatching enzyme
Source: PubMed Central journal article supplement (PMC3819744; doi:10.1186/1471-2148-13-231), 2013-10-25
Supplement: 1471-2148-13-231-S2.pdf [file 1471-2148-13-231-S2.pdf]

Fig. S2 Kawaguchi et al

ancEuteLCE NAMKCFRNKYSCLWKKKSANGMVDVPIIISDVYSSVEEETIETAMKDFHCKTCIRFLIPRKT  
ancNeotLCE NAMKCFRRKYSCLWKKKSANGKVEVPIIISDVYSSAEKETIKNAMKDFHCKTCIRFVPROT  
ancAcmoLCE NAMKCFSKTIYSCLWPKSANGKVEIPFIISEKYADTEKKAILNAMKDFDSKTCIRFVPRKT  
ancAcanLCE NAMKCFNKTIYSCLWPKSANGNVEIPFIISEKYDDTEKNAILNAMKDFECKTCIRFVPRKT  
ancAtheLCE NAMKCFNKPIYSCLWPKSSNGNVEIPFIISEKYDDTEKNITILNAMKGFECKTCIRFVPRRT  
ancBeloLCE NAMKCFNKPIYSCLWPKSSNGNVEIPFIISEKYDDTEKNITILNAMKGFESKTCIRFVPRRT  
ancOryzLCE NAMKCFGDPDSCFVWPKSSNGIVKVPYVVSVDNYDNSEKETIRNAMKEFAEKTCIFHFVPRNN

74 91

ancEuteLCE QRAYLNIESRGGCFSSMGRVYGDQTLSTARFGCVQHGI IQHELLHALGFYHEHTRSDDRQ  
ancNeotLCE QRAYLNIESRPGCFSSMGRIGDKQIVSLSRFGCVQHGI IQHELLHALGFYHEHTRSDDRQ  
ancAcmoLCE QRAYLNIEPRYGCFSILMGRIGDKQVVSLQRFQCVQHGI IQHELLHALGFYHEHTRSDDRQ  
ancAcanLCE QRAYLSIEPRYGCFSILGRIGDKQVVSLQRFQCVRHGI IQHELLHALGFYHEHTRSDDRQ  
ancAtheLCE ERAYLSIEPRYGCFSILGRIGDKQVVSLQRFQCVNHGI IQHELLHALGFYHEHTRSDDRQ  
ancBeloLCE ERAYLSIEPRYGCFSILGRIGDKQVVSLQRFQCVNHGI IQHELLHALGFYHEHTRSDDRQ  
ancOryzLCE ERAYLSIEPRYGCFSILGRIGDKQVVSLQRFQCVKHGM IQHELLHALGFYHEHTRSDDRQ

135

ancEuteLCE YVRINWENIYNVAVYVNFQKQDTNNLNTPYDYSSVMHYGRTAFTNYHRKETITPIPDPSVP  
ancNeotLCE YVRINWENIHNVAVYVNFQKQDTNNLNTPYDYSSVMHYGRTAFTNYHRKETITPIPDPSVP  
ancAcmoLCE YVRINWENINDYFVYVNFQKQDTNNLNTPYDYSSVMHYGRTAFGKYGRKETITPIPDPSVP  
ancAcanLCE YVRINWENINEYFVYVNFQKQDTNNLNTPYDYSSVMHYGRTAFGKYGRKETITPIPDPSVP  
ancAtheLCE YVRINWENIKEYYINNFQKMDTNNLDTPYDYSSVMHYGRTAFGKYGRKETITPIPDPTVP  
ancBeloLCE YVRINWENIKEYYINNFQKMDTNNLDTPYDYSSVMHYGRTAFGKYGRKETITPIPDPTVP  
ancOryzLCE HVKINWENIIEYVYVNFQKMDTNNLDTPYDYSSVMHYGRTAFGKDRKETITPIPDPTVA

183

ancEuteLCE IGQREGMSDIDILRINRLYKC  
ancNeotLCE IGQREGMSDIDILRINRLYKC  
ancAcmoLCE IGQREGMSDIDILRINRLYKC  
ancAcanLCE IGQREGMSDIDILRINRLYKC  
ancAtheLCE IGQREGMSDIDILRINRLYKC  
ancBeloLCE IGQREGMSDIDILRINRLYKC  
ancOryzLCE IGQTVGMSDIDILRINRLYKC
